# Supplementary material for: The anti-soiling performance of highly reflective superhydrophobic nanoparticle-textured mirrors
Source: Royal Society of Chemistry journal article supplement (doi:10.1039/c8nr03024c), 2018-01-01
Supplement: c8nr03024c1.pdf [file c8nr03024c1.pdf]

## Supplementary Information

# Anti-soiling performance of high reflective superhydrophobic nanoparticle-textured mirror

Gyoung Gug Jang<sup>\*a</sup>, D. Barton Smith<sup>a</sup>, Frederick Alyious List III,<sup>b</sup> Dominc F. Lee,<sup>c</sup> Anton Ievlev,<sup>d</sup> Liam Collins,<sup>d</sup> Jaehyeung Park,<sup>e</sup> and Georgios Polizos<sup>a</sup>

- a. Energy and Transportation Science Division, Oak Ridge National Laboratory (ORNL), Oak Ridge, TN 37831
- b. Materials Science and Technology Division, ORNL
- c. Sustainable Electricity Program Office, ORNL
- d. Center for Nanophase Materials Science, ORNL
- e. Division of Advanced Materials Engineering, Dong-Eui University, Busan 47340, Korea

<sup>\*</sup>Corresponding author: [jangg@ornl.gov](mailto:jangg@ornl.gov)

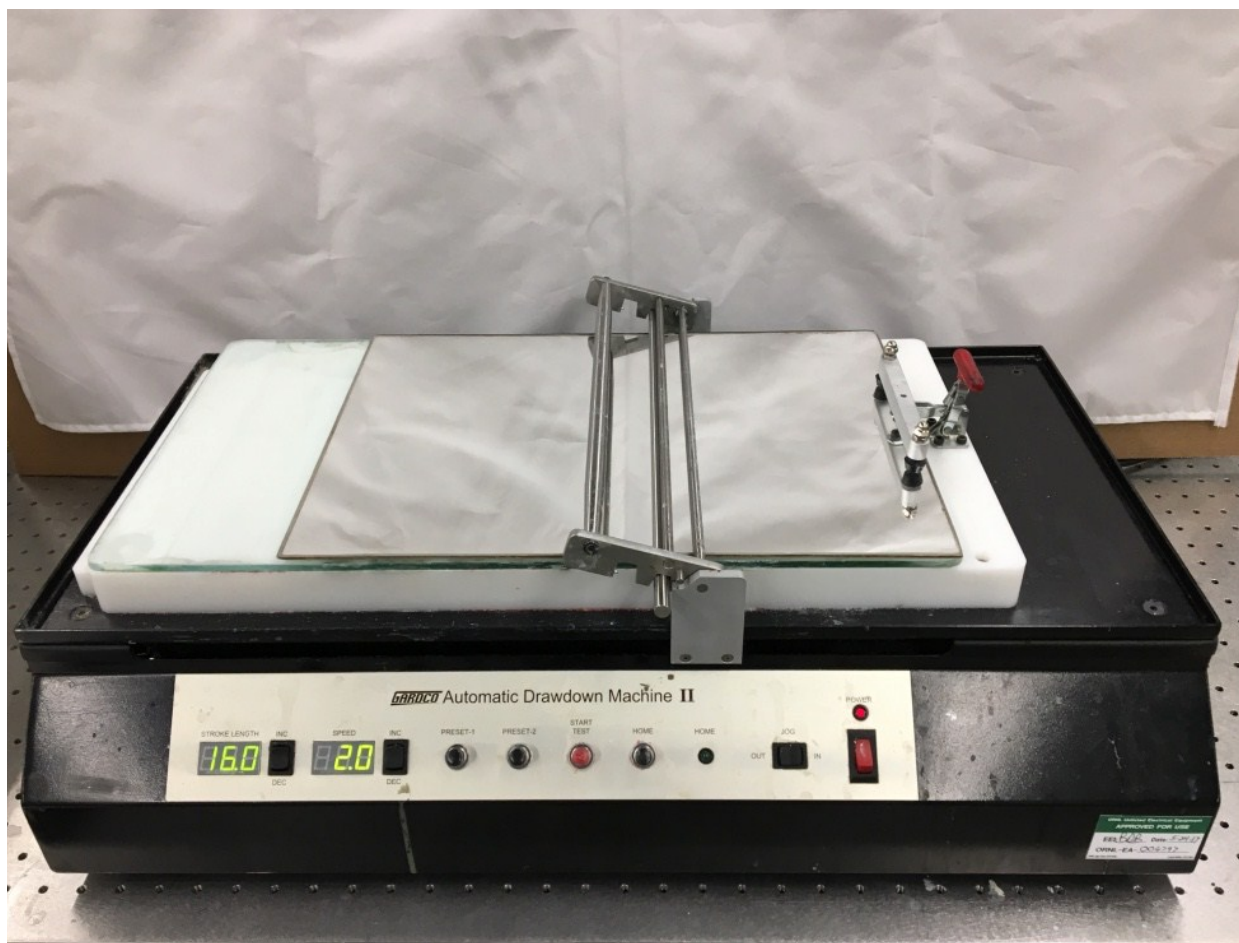

**Figure S1.** Fabrication of SiO<sub>2</sub> nanoparticle thin film by rod draw-down coating. Photograph of a large scale NP thin film deposited by rod-coating on solar mirror (600 cm<sup>2</sup>)

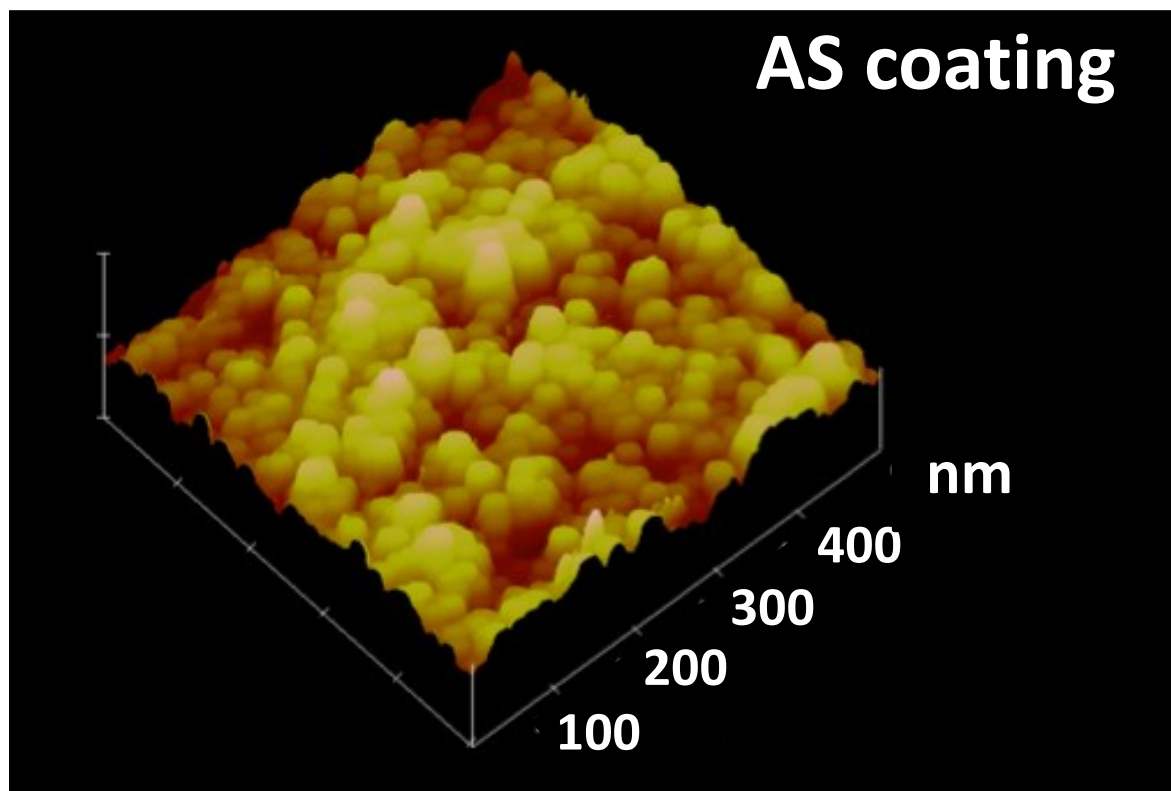

**Figure S2.** AFM image of AS coated surface with 30.1 nm of RMS roughness

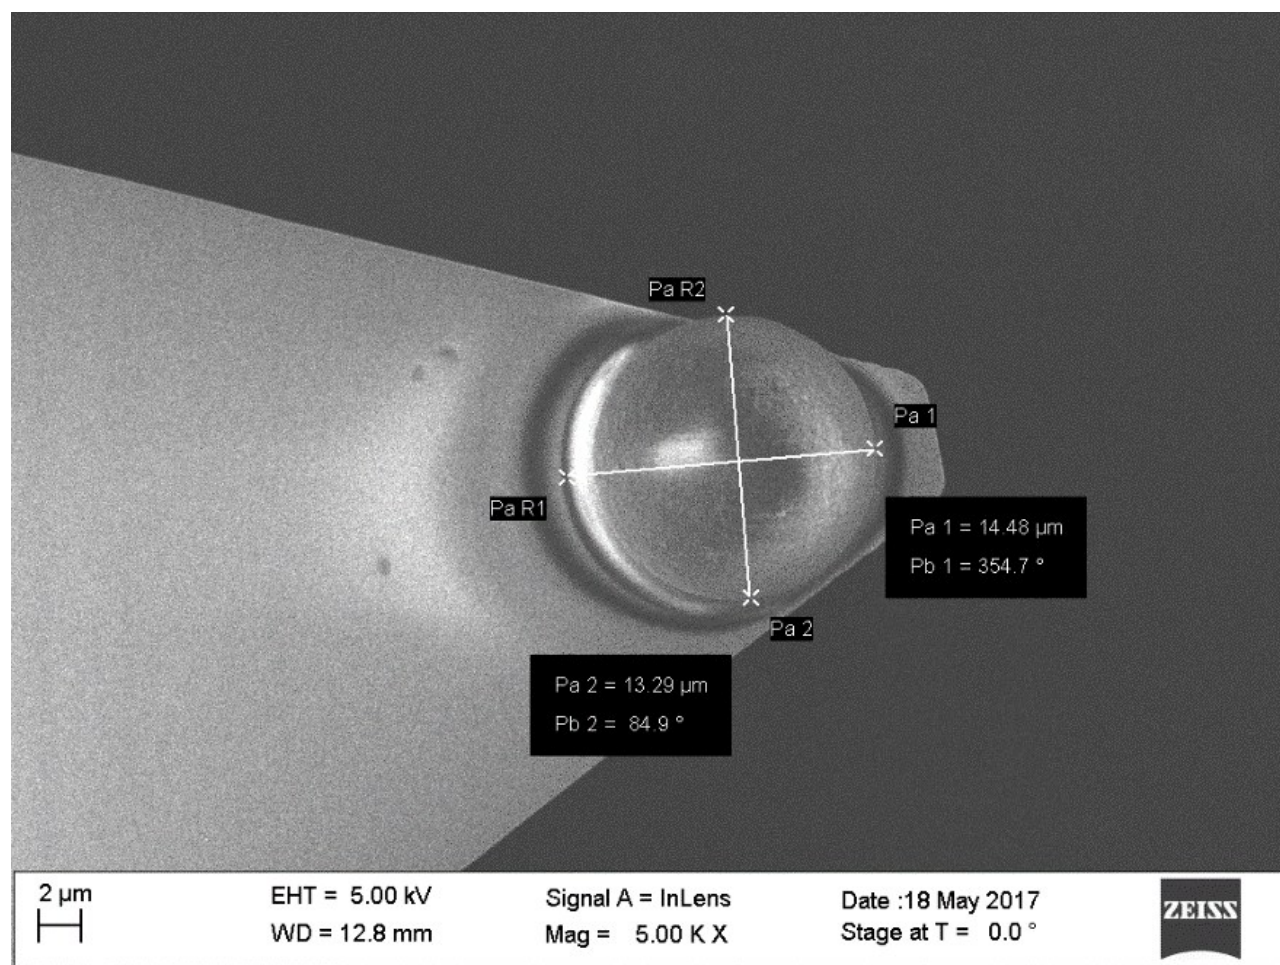

**Figure S3** SEM image of the AFM cantilever used to measure the adhesive force

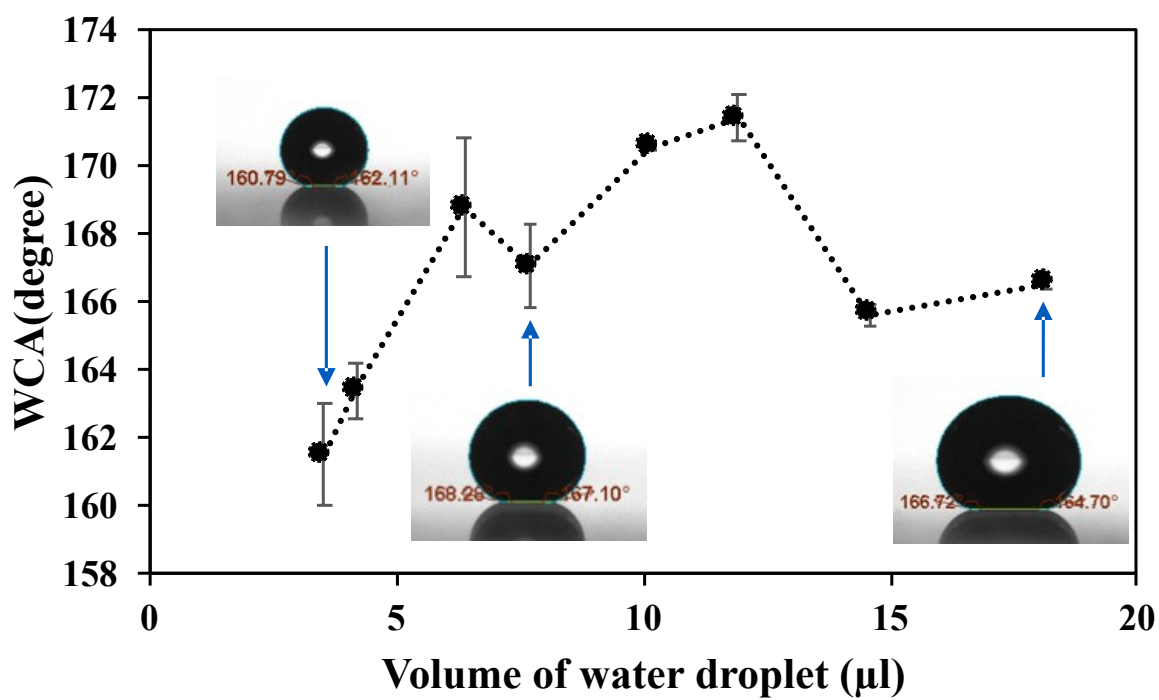

**Figure S4** WCA measurement as a function of water droplet volume on the same spot of AS coated surface. The number of WCA image analysis per data point was  $\geq 5$ . Error bars are the standard deviations in the mean values.

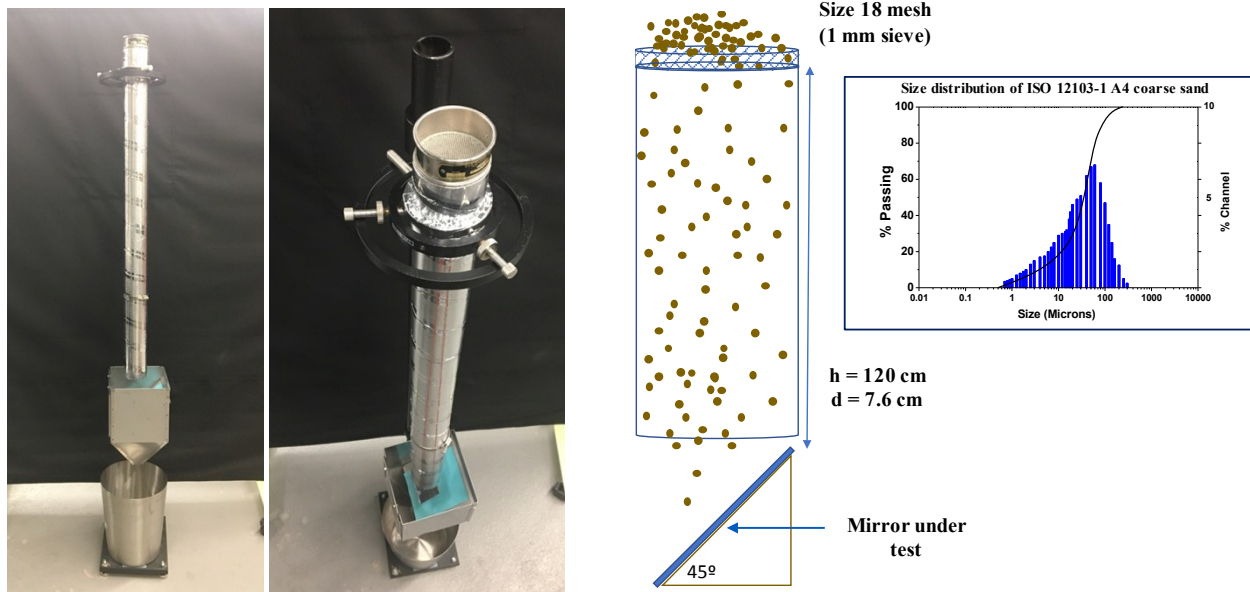

**Figure S5** Modified Falling Sand Abrasion Test that provides uniform applications of test dust for gravimetric and reflectivity measurements of accumulated dust.

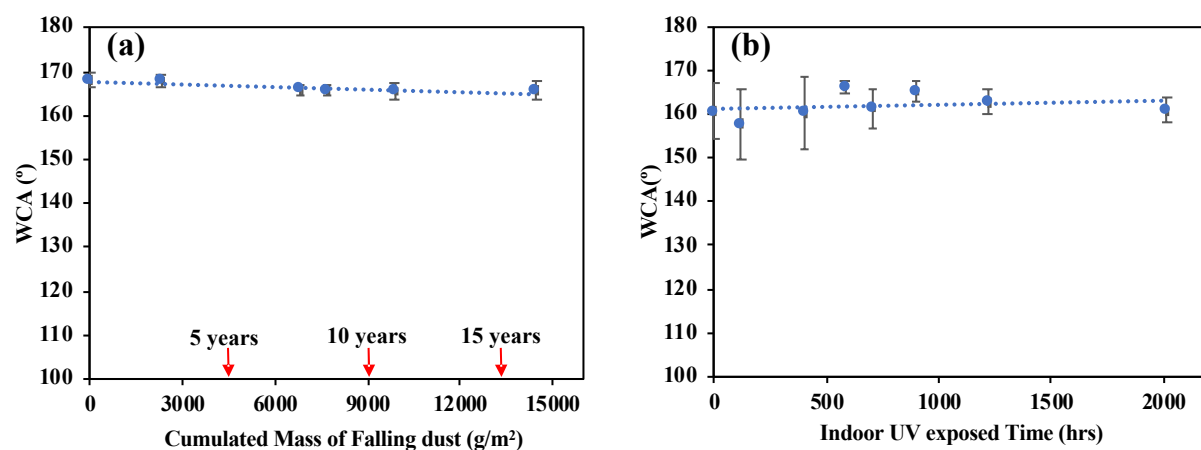

**Figure S6** Mechanical/UV durability tests for SH mirror and SH glasses. a) Sand soiling abrasion tracking of SH mirror after gravimetric soiling & dusting, The 5 year sand abrasion amount is 4560 g/m<sup>2</sup>, b) UV weathering feature of SH glasses.
